# Supplementary material
Source: PubMed Central journal article supplement (PMC3175115)
Supplement: NIHMS266838-supplement-eTables.pdf [file NIHMS266838-supplement-eTables.pdf]

## Supplementary Online Content

Carter JL, Green PS, Montine TJ, et al. Diet intervention and cerebrospinal fluid biomarkers in amnesic and cognitive impairment. *Arch Neurol*. 2011;68(6):743-752.

**eTable 1.** Mean values with SEM for metabolic and lipid indices for normal control and aMCI groups following the LOW or HIGH diet.

**eTable 2.** Mean values with (SEM) for AD CSF biomarkers and delayed memory scores for normal control and aMCI groups following the LOW or HIGH diet.

This supplementary material has been provided by the authors to give readers additional information about their work.

eTable 1. Mean (SEM) Values for Metabolic and Lipid Indexes for the Healthy Control and aMCI Groups After the LOW or HIGH Diet

| Variable                    | Healthy Control<br>Individuals |                        | aMCI Patients         |                       |
|-----------------------------|--------------------------------|------------------------|-----------------------|-----------------------|
|                             | LOW                            | HIGH                   | LOW                   | HIGH                  |
| Insulin AUC,<br>μU/mL       |                                |                        |                       |                       |
| Week 0                      | 9675.68<br>(1343.86)           | 9773.25<br>(1485.69)   | 8250.35<br>(1236.17)  | 7032.65<br>(1150.81)  |
| Week 4                      | 7411.02<br>(1276.42)           | 10 480.83<br>(1411.14) | 7300.33<br>(1174.14)  | 7785.85<br>(1093.06)  |
| Glucose AUC,<br>mg/dL       |                                |                        |                       |                       |
| Week 0                      | 18 442.97<br>(1174.60)         | 18 980.89<br>(1255.70) | 17 829.80<br>(921.43) | 16 834.50<br>(857.81) |
| Week 4                      | 16 108.12<br>(1258.13)         | 18 495.00<br>(1345.00) | 17 572.50<br>(986.96) | 16 566.25<br>(918.81) |
| HOMA-IR (log)               |                                |                        |                       |                       |
| Week 0                      | 1.19 (.11)                     | 1.25 (.13)             | 1.14 (.10)            | 1.16 (.10)            |
| Week 4                      | 1.08 (.13)                     | 1.36 (.14)             | 1.10 (.12)            | 1.18 (.11)            |
| Weight, lb                  |                                |                        |                       |                       |
| Week 0                      | 169.61 (12.29)                 | 181.18<br>(12.78)      | 166.49 (9.50)         | 175.75 (8.73)         |
| Week 4                      | 170.02 (12.09)                 | 179.74<br>(12.57)      | 165.45 (9.35)         | 175.27 (8.59)         |
| Total cholesterol,<br>mg/dL |                                |                        |                       |                       |
| Week 0                      | 201.00 (10.59)                 | 234.56<br>(11.71)      | 218.36 (9.39)         | 210.80 (9.07)         |
| Week 4                      | 187.55 (9.97)                  | 246.78<br>(11.02)      | 191.93 (8.84)         | 236.60 (8.54)         |
| LDL-C, mg/dL                |                                |                        |                       |                       |
| Week 0                      | 117.18 (9.16)                  | 146.78<br>(10.13)      | 135.57 (8.12)         | 127.67 (7.85)         |
| Week 4                      | 102.27 (8.77)                  | 154.67 (9.70)          | 112.57 (7.78)         | 150.60 (7.51)         |
| HDL-C, mg/dL                |                                |                        |                       |                       |
| Week 0                      | 56.18 (5.28)                   | 65.89 (5.84)           | 64.07 (4.68)          | 59.80 (4.52)          |
| Week 4                      | 52.09 (5.48)                   | 70.67 (6.06)           | 55.43 (4.86)          | 63.87 (4.70)          |
| LDL/HDL ratio               |                                |                        |                       |                       |

|        |            |            |            |            |
|--------|------------|------------|------------|------------|
| Week 0 | 2.31 (.24) | 2.35 (.27) | 2.20 (.22) | 2.29 (.21) |
| Week 4 | 2.10 (.25) | 2.37 (.27) | 2.18 (.23) | 2.54 (.21) |

Abbreviations: aMCI, amnestic mild cognitive impairment; AUC, area under the curve; HDL-C, high density lipoprotein cholesterol; HIGH, high saturated fat/high glycemic index; HOMA-IR, homeostatic model assessment of insulin resistance; LDL-C, low density lipoprotein cholesterol; LOW, low saturated fat/low glycemic index.

<sup>a</sup>Time × diet interaction,  $P \leq .05$ .

<sup>b</sup>Time × diet interaction,  $P \leq .10$ .

<sup>c</sup>Time × diet interaction,  $P \leq .001$ .

<sup>d</sup>Time × diet × diagnosis interaction,  $P \leq .05$ .

eTable 2. Mean (SEM) Values for Alzheimer Disease CSF Biomarkers and Delayed Memory Scores for the Healthy Control and aMCI Groups Following the LOW or HIGH Diet

| Variable                                       | Healthy Control Individuals |                      | aMCI Patients        |                      |
|------------------------------------------------|-----------------------------|----------------------|----------------------|----------------------|
|                                                | LOW                         | HIGH                 | LOW                  | HIGH                 |
| CSF A $\beta$ 42,<br>pg/mL                     |                             |                      |                      |                      |
| Week 0                                         | 506.49 (50.94)              | 384.03 (56.95)       | 397.18 (48.57)       | 439.04 (46.5)        |
| Week 4                                         | 452.04 (51.96)              | 476.75 (58.10)       | 519.43 (49.55)       | 445.63 (47.44)       |
| CSF A $\beta$ 40,<br>pg/mL                     |                             |                      |                      |                      |
| Week 0                                         | 9116.13<br>(1289.33)        | 8796.32<br>(1289.33) | 9212.94<br>(1206.06) | 7659.42<br>(946.11)  |
| Week 4                                         | 1011.44<br>(1514.20)        | 9101.32<br>(1514.20) | 9316.99<br>(1416.41) | 8473.04<br>(1111.12) |
| Tau protein,<br>pg/mL                          |                             |                      |                      |                      |
| Week 0                                         | 80.41 (16.85)               | 76.73 (18.83)        | 113.18 (16.84)       | 74.80 (15.38)        |
| Week 4                                         | 77.95 (13.86)               | 73.47 (15.50)        | 109.87 (13.86)       | 75.76 (12.66)        |
| p-tau-181,<br>pg/mL                            |                             |                      |                      |                      |
| Week 0                                         | 61.67 (12.75)               | 66.50 (14.25)        | 88.80 (12.75)        | 64.93 (11.18)        |
| Week 4                                         | 60.39 (10.78)               | 65.68 (12.05)        | 87.28 (10.78)        | 66.10 (9.46)         |
| CSF insulin,<br>$\mu$ U/mL                     |                             |                      |                      |                      |
| Week 0                                         | 0.76 (0.05)                 | 0.86 (0.05)          | 0.74 (0.04)          | 0.76 (0.04)          |
| Week 4                                         | 0.73 (0.03)                 | 0.74 (0.04)          | 0.80 (0.03)          | 0.76 (0.03)          |
| APOE, ng/mL                                    |                             |                      |                      |                      |
| Week 0                                         | 1107.02<br>(100.87)         | 1161.80<br>(112.78)  | 971.37 (100.87)      | 1115.34<br>(85.25)   |
| Week 4                                         | 1110.51<br>(109.83)         | 981.81 (122.79)      | 1076.32<br>(109.83)  | 1076.32<br>(92.82)   |
| CSF F2-<br>isoprostanes<br>(log) <sup>pg</sup> |                             |                      |                      |                      |
| Week 0                                         | 3.29 (0.12)                 | 3.20 (0.16)          | 3.35 (0.12)          | 3.30 (0.09)          |
| Week 4                                         | 3.19 (0.12)                 | 3.35 (0.16)          | 3.27 (0.12)          | 3.30 (0.09)          |
| Brief Visual<br>Memory                         |                             |                      |                      |                      |

|                  |              |              |              |              |
|------------------|--------------|--------------|--------------|--------------|
| Test             |              |              |              |              |
| Week 0           | 8.27 (0.77)  | 9.89 (0.85)  | 7.39 (0.71)  | 8.27 (0.66)  |
| Week 4           | 9.82 (0.67)  | 9.56 (0.74)  | 8.31 (0.62)  | 8.40 (0.58)  |
| Story recall     |              |              |              |              |
| Week 0           | 21.09 (1.55) | 22.69 (1.74) | 18.48 (1.43) | 20.37 (1.31) |
| Week 4           | 18.80 (1.85) | 23.19 (2.04) | 21.46 (1.70) | 22.30 (1.58) |
| Word list recall |              |              |              |              |
| Week 0           | 13.27 (0.83) | 12.78 (0.92) | 11.62 (0.76) | 11.33 (0.71) |
| Week 4           | 13.27 (0.86) | 13.67 (0.95) | 11.77 (0.80) | 11.87 (0.74) |

Abbreviations: A $\beta$ ,  $\beta$ -amyloid; aMCI, amnesic mild cognitive impairment; *APOE*, apolipoprotein E; CSF, cerebrospinal fluid; HIGH, high saturated fat/high glycemic index; LOW, low saturated fat/low glycemic index; p-tau, phosphorylated tau.

<sup>a</sup>Time  $\times$  diet  $\times$  diagnosis interaction,  $P \leq .001$ .

<sup>b</sup>Time  $\times$  diet interaction,  $P \leq .05$ .

<sup>c</sup>Time  $\times$  diet interaction,  $P \leq .01$ .

<sup>d</sup>Time  $\times$  diet  $\times$  diagnosis interaction,  $P \leq .10$ .

<sup>e</sup>Test  $\times$  time  $\times$  diet interaction for the 3 delayed memory tests,  $P \leq .05$ .
